# Supplementary material for: Combining Visual Contrast Information with Sound Can Produce Faster Decisions
Source: Preprints.org preprint supplement (doi:10.20944/preprints201910.0247.v1), 2019-10-22
Supplement: Supplementary file 1 [file TABLE-S1.xlsx]

## Sheet: Feuil1
Nelements	dC	C Polarity	Sound Frequ	Response T
n10	dC1	ON	nosound	387.246
n10	dC1	ON	nosound	356.765
n10	dC1	ON	nosound	621.41
n10	dC1	ON	nosound	596.393
n10	dC1	ON	nosound	659.673
n10	dC1	ON	nosound	506.086
n10	dC1	ON	nosound	570.951
n10	dC1	ON	nosound	453.247
n10	dC1	ON	nosound	626.77
n10	dC1	ON	nosound	531.902
n10	dC1	ON	nosound	445.198
n10	dC1	ON	nosound	499.338
n10	dC1	ON	nosound	590.387
n10	dC1	ON	nosound	469.31
n10	dC1	ON	nosound	518.719
n10	dC1	ON	nosound	610.75
n10	dC1	ON	nosound	643.461
n10	dC1	ON	nosound	465.414
n10	dC1	ON	nosound	635.139
n10	dC1	ON	nosound	451.177
n1	dC1	ON	nosound	451.074
n1	dC1	ON	nosound	419.765
n1	dC1	ON	nosound	824.544
n1	dC1	ON	nosound	572.378
n1	dC1	ON	nosound	578.058
n1	dC1	ON	nosound	596.531
n1	dC1	ON	nosound	540.333
n1	dC1	ON	nosound	490.051
n1	dC1	ON	nosound	497.275
n1	dC1	ON	nosound	514.735
n1	dC1	ON	nosound	465.534
n1	dC1	ON	nosound	466.284
n1	dC1	ON	nosound	627.414
n1	dC1	ON	nosound	592.391
n1	dC1	ON	nosound	628.961
n1	dC1	ON	nosound	626.756
n1	dC1	ON	nosound	542.445
n1	dC1	ON	nosound	541.256
n1	dC1	ON	nosound	719.508
n1	dC1	ON	nosound	627.849
n20	dC1	ON	nosound	395.158
n20	dC1	ON	nosound	404.536
n20	dC1	ON	nosound	579.382
n20	dC1	ON	nosound	649.428
n20	dC1	ON	nosound	602.362
n20	dC1	ON	nosound	699.883
n20	dC1	ON	nosound	481.587
n20	dC1	ON	nosound	546.182
n20	dC1	ON	nosound	555.287
n20	dC1	ON	nosound	697.449
n20	dC1	ON	nosound	380.643
n20	dC1	ON	nosound	394.524
n20	dC1	ON	nosound	604.399
n20	dC1	ON	nosound	761.502
n20	dC1	ON	nosound	626.282
n20	dC1	ON	nosound	524.018
n20	dC1	ON	nosound	482.716
n20	dC1	ON	nosound	470.771
n20	dC1	ON	nosound	656.746
n20	dC1	ON	nosound	474.623
n5	dC1	ON	nosound	482.319
n5	dC1	ON	nosound	370.665
n5	dC1	ON	nosound	689.455
n5	dC1	ON	nosound	575.742
n5	dC1	ON	nosound	592.092
n5	dC1	ON	nosound	561.283
n5	dC1	ON	nosound	450.512
n5	dC1	ON	nosound	433.509
n5	dC1	ON	nosound	592.545
n5	dC1	ON	nosound	529.034
n5	dC1	ON	nosound	485.551
n5	dC1	ON	nosound	426.751
n5	dC1	ON	nosound	494.326
n5	dC1	ON	nosound	633.052
n5	dC1	ON	nosound	705.535
n5	dC1	ON	nosound	754.016
n5	dC1	ON	nosound	553.092
n5	dC1	ON	nosound	457.912
n5	dC1	ON	nosound	753.433
n5	dC1	ON	nosound	603.054
n10	dC2	ON	nosound	395.714
n10	dC2	ON	nosound	560.962
n10	dC2	ON	nosound	909.6
n10	dC2	ON	nosound	624.413
n10	dC2	ON	nosound	614.943
n10	dC2	ON	nosound	414.469
n10	dC2	ON	nosound	409.51
n10	dC2	ON	nosound	405.029
n10	dC2	ON	nosound	614.505
n10	dC2	ON	nosound	500.166
n10	dC2	ON	nosound	577.324
n10	dC2	ON	nosound	424.969
n10	dC2	ON	nosound	513.338
n10	dC2	ON	nosound	496.327
n10	dC2	ON	nosound	483.597
n10	dC2	ON	nosound	657.457
n10	dC2	ON	nosound	473.932
n10	dC2	ON	nosound	445.225
n10	dC2	ON	nosound	575.499
n10	dC2	ON	nosound	527.518
n1	dC2	ON	nosound	459.28
n1	dC2	ON	nosound	520.616
n1	dC2	ON	nosound	661.437
n1	dC2	ON	nosound	594.393
n1	dC2	ON	nosound	635.03
n1	dC2	ON	nosound	490.368
n1	dC2	ON	nosound	469.764
n1	dC2	ON	nosound	474.015
n1	dC2	ON	nosound	560.872
n1	dC2	ON	nosound	592.141
n1	dC2	ON	nosound	475.799
n1	dC2	ON	nosound	499.405
n1	dC2	ON	nosound	668.179
n1	dC2	ON	nosound	420.278
n1	dC2	ON	nosound	625.759
n1	dC2	ON	nosound	535.538
n1	dC2	ON	nosound	465.676
n1	dC2	ON	nosound	474.46
n1	dC2	ON	nosound	483.675
n1	dC2	ON	nosound	441.288
n20	dC2	ON	nosound	486.805
n20	dC2	ON	nosound	353.633
n20	dC2	ON	nosound	613.404
n20	dC2	ON	nosound	643.426
n20	dC2	ON	nosound	469.671
n20	dC2	ON	nosound	616.334
n20	dC2	ON	nosound	471.617
n20	dC2	ON	nosound	429.301
n20	dC2	ON	nosound	612.316
n20	dC2	ON	nosound	575.579
n20	dC2	ON	nosound	354.184
n20	dC2	ON	nosound	467.926
n20	dC2	ON	nosound	788.521
n20	dC2	ON	nosound	423.28
n20	dC2	ON	nosound	722.396
n20	dC2	ON	nosound	458.856
n20	dC2	ON	nosound	407.419
n20	dC2	ON	nosound	418.752
n20	dC2	ON	nosound	756.023
n20	dC2	ON	nosound	504.707
n5	dC2	ON	nosound	449.726
n5	dC2	ON	nosound	656.352
n5	dC2	ON	nosound	582.386
n5	dC2	ON	nosound	559.369
n5	dC2	ON	nosound	623.949
n5	dC2	ON	nosound	474.605
n5	dC2	ON	nosound	502.388
n5	dC2	ON	nosound	433.707
n5	dC2	ON	nosound	560.045
n5	dC2	ON	nosound	457.212
n5	dC2	ON	nosound	419.275
n5	dC2	ON	nosound	333.278
n5	dC2	ON	nosound	447.296
n5	dC2	ON	nosound	816.54
n5	dC2	ON	nosound	558.206
n5	dC2	ON	nosound	609.713
n5	dC2	ON	nosound	473.296
n5	dC2	ON	nosound	440.014
n5	dC2	ON	nosound	545.972
n5	dC2	ON	nosound	530.854
n10	dC3	ON	nosound	410.778
n10	dC3	ON	nosound	388.446
n10	dC3	ON	nosound	559.369
n10	dC3	ON	nosound	574.38
n10	dC3	ON	nosound	507.161
n10	dC3	ON	nosound	512.873
n10	dC3	ON	nosound	480.815
n10	dC3	ON	nosound	449.258
n10	dC3	ON	nosound	618.077
n10	dC3	ON	nosound	735.279
n10	dC3	ON	nosound	451.297
n10	dC3	ON	nosound	482.868
n10	dC3	ON	nosound	550.365
n10	dC3	ON	nosound	610.402
n10	dC3	ON	nosound	489.125
n10	dC3	ON	nosound	535.699
n10	dC3	ON	nosound	543.522
n10	dC3	ON	nosound	472.604
n10	dC3	ON	nosound	598.281
n10	dC3	ON	nosound	409.622
n1	dC3	ON	nosound	451.279
n1	dC3	ON	nosound	433.623
n1	dC3	ON	nosound	664.911
n1	dC3	ON	nosound	690.456
n1	dC3	ON	nosound	506.947
n1	dC3	ON	nosound	532.94
n1	dC3	ON	nosound	506.454
n1	dC3	ON	nosound	442.69
n1	dC3	ON	nosound	561.639
n1	dC3	ON	nosound	498.82
n1	dC3	ON	nosound	455.529
n1	dC3	ON	nosound	476.772
n1	dC3	ON	nosound	505.53
n1	dC3	ON	nosound	562.371
n1	dC3	ON	nosound	462.604
n1	dC3	ON	nosound	471.506
n1	dC3	ON	nosound	489.244
n1	dC3	ON	nosound	445.304
n1	dC3	ON	nosound	482.027
n1	dC3	ON	nosound	543.527
n20	dC3	ON	nosound	413.273
n20	dC3	ON	nosound	387.002
n20	dC3	ON	nosound	718.474
n20	dC3	ON	nosound	594.389
n20	dC3	ON	nosound	539.079
n20	dC3	ON	nosound	548.095
n20	dC3	ON	nosound	506.31
n20	dC3	ON	nosound	432.453
n20	dC3	ON	nosound	667.267
n20	dC3	ON	nosound	490.279
n20	dC3	ON	nosound	378.251
n20	dC3	ON	nosound	401.348
n20	dC3	ON	nosound	563.372
n20	dC3	ON	nosound	661.436
n20	dC3	ON	nosound	712.103
n20	dC3	ON	nosound	403.089
n20	dC3	ON	nosound	434.439
n20	dC3	ON	nosound	459.387
n20	dC3	ON	nosound	609.449
n20	dC3	ON	nosound	449.538
n5	dC3	ON	nosound	460.063
n5	dC3	ON	nosound	405.23
n5	dC3	ON	nosound	490.719
n5	dC3	ON	nosound	589.405
n5	dC3	ON	nosound	523.676
n5	dC3	ON	nosound	563.534
n5	dC3	ON	nosound	451.018
n5	dC3	ON	nosound	456.611
n5	dC3	ON	nosound	505.884
n5	dC3	ON	nosound	481.765
n5	dC3	ON	nosound	418.275
n5	dC3	ON	nosound	416.268
n5	dC3	ON	nosound	537.354
n5	dC3	ON	nosound	615.407
n5	dC3	ON	nosound	518.317
n5	dC3	ON	nosound	554.28
n5	dC3	ON	nosound	473.896
n5	dC3	ON	nosound	422.332
n5	dC3	ON	nosound	529.81
n5	dC3	ON	nosound	443.788
n10	dC1	ON	200hz	380.211
n10	dC1	ON	200hz	722.37
n10	dC1	ON	200hz	576.375
n10	dC1	ON	200hz	562.172
n10	dC1	ON	200hz	561.425
n10	dC1	ON	200hz	540.174
n10	dC1	ON	200hz	523.301
n10	dC1	ON	200hz	472.056
n10	dC1	ON	200hz	589.811
n10	dC1	ON	200hz	572.223
n10	dC1	ON	200hz	378.852
n10	dC1	ON	200hz	461.368
n10	dC1	ON	200hz	499.329
n10	dC1	ON	200hz	481.283
n10	dC1	ON	200hz	718.722
n10	dC1	ON	200hz	882.893
n10	dC1	ON	200hz	462.264
n10	dC1	ON	200hz	490.899
n10	dC1	ON	200hz	522.912
n10	dC1	ON	200hz	460.139
n1	dC1	ON	200hz	430.918
n1	dC1	ON	200hz	566.487
n1	dC1	ON	200hz	609.402
n1	dC1	ON	200hz	690.456
n1	dC1	ON	200hz	541.456
n1	dC1	ON	200hz	595.002
n1	dC1	ON	200hz	470.429
n1	dC1	ON	200hz	495.75
n1	dC1	ON	200hz	698.415
n1	dC1	ON	200hz	620.395
n1	dC1	ON	200hz	473.445
n1	dC1	ON	200hz	600.542
n1	dC1	ON	200hz	562.371
n1	dC1	ON	200hz	467.308
n1	dC1	ON	200hz	571.913
n1	dC1	ON	200hz	467.594
n1	dC1	ON	200hz	552.286
n1	dC1	ON	200hz	469.217
n1	dC1	ON	200hz	633.881
n1	dC1	ON	200hz	612.335
n20	dC1	ON	200hz	448.991
n20	dC1	ON	200hz	461.272
n20	dC1	ON	200hz	610.403
n20	dC1	ON	200hz	621.804
n20	dC1	ON	200hz	536.297
n20	dC1	ON	200hz	593.795
n20	dC1	ON	200hz	492.627
n20	dC1	ON	200hz	445.846
n20	dC1	ON	200hz	620.449
n20	dC1	ON	200hz	468.258
n20	dC1	ON	200hz	464.378
n20	dC1	ON	200hz	478.397
n20	dC1	ON	200hz	403.27
n20	dC1	ON	200hz	497.329
n20	dC1	ON	200hz	696.338
n20	dC1	ON	200hz	415.437
n20	dC1	ON	200hz	441.177
n20	dC1	ON	200hz	466.831
n20	dC1	ON	200hz	565.121
n20	dC1	ON	200hz	539.773
n5	dC1	ON	200hz	355.341
n5	dC1	ON	200hz	409.296
n5	dC1	ON	200hz	492.326
n5	dC1	ON	200hz	466.508
n5	dC1	ON	200hz	587.352
n5	dC1	ON	200hz	585.347
n5	dC1	ON	200hz	424.1
n5	dC1	ON	200hz	426.214
n5	dC1	ON	200hz	512.076
n5	dC1	ON	200hz	520.173
n5	dC1	ON	200hz	501.402
n5	dC1	ON	200hz	565.5
n5	dC1	ON	200hz	530.351
n5	dC1	ON	200hz	423.28
n5	dC1	ON	200hz	446.978
n5	dC1	ON	200hz	568.905
n5	dC1	ON	200hz	401.421
n5	dC1	ON	200hz	458.412
n5	dC1	ON	200hz	624.334
n5	dC1	ON	200hz	501.699
n10	dC2	ON	200hz	428.217
n10	dC2	ON	200hz	422.317
n10	dC2	ON	200hz	561.37
n10	dC2	ON	200hz	592.39
n10	dC2	ON	200hz	579.796
n10	dC2	ON	200hz	476.725
n10	dC2	ON	200hz	393.798
n10	dC2	ON	200hz	402.741
n10	dC2	ON	200hz	519.231
n10	dC2	ON	200hz	424.53
n10	dC2	ON	200hz	491.054
n10	dC2	ON	200hz	601.485
n10	dC2	ON	200hz	470.31
n10	dC2	ON	200hz	526.348
n10	dC2	ON	200hz	613.622
n10	dC2	ON	200hz	502.312
n10	dC2	ON	200hz	432.995
n10	dC2	ON	200hz	404.476
n10	dC2	ON	200hz	528.281
n10	dC2	ON	200hz	495.503
n1	dC2	ON	200hz	444.839
n1	dC2	ON	200hz	429.068
n1	dC2	ON	200hz	570.376
n1	dC2	ON	200hz	679.297
n1	dC2	ON	200hz	575.238
n1	dC2	ON	200hz	597.325
n1	dC2	ON	200hz	406.836
n1	dC2	ON	200hz	520.746
n1	dC2	ON	200hz	608.557
n1	dC2	ON	200hz	504.875
n1	dC2	ON	200hz	452.4
n1	dC2	ON	200hz	445.339
n1	dC2	ON	200hz	460.807
n1	dC2	ON	200hz	723.479
n1	dC2	ON	200hz	544.992
n1	dC2	ON	200hz	519.845
n1	dC2	ON	200hz	490.562
n1	dC2	ON	200hz	443.015
n1	dC2	ON	200hz	447.276
n1	dC2	ON	200hz	458.172
n20	dC2	ON	200hz	410.668
n20	dC2	ON	200hz	413.197
n20	dC2	ON	200hz	519.342
n20	dC2	ON	200hz	474.312
n20	dC2	ON	200hz	623.293
n20	dC2	ON	200hz	578.139
n20	dC2	ON	200hz	415.615
n20	dC2	ON	200hz	421.158
n20	dC2	ON	200hz	457.904
n20	dC2	ON	200hz	395.613
n20	dC2	ON	200hz	469.266
n20	dC2	ON	200hz	569.712
n20	dC2	ON	200hz	467.817
n20	dC2	ON	200hz	425.848
n20	dC2	ON	200hz	481.751
n20	dC2	ON	200hz	439.235
n20	dC2	ON	200hz	448.647
n20	dC2	ON	200hz	432.764
n20	dC2	ON	200hz	557.507
n20	dC2	ON	200hz	514.033
n5	dC2	ON	200hz	465.934
n5	dC2	ON	200hz	467.154
n5	dC2	ON	200hz	522.376
n5	dC2	ON	200hz	490.324
n5	dC2	ON	200hz	518.756
n5	dC2	ON	200hz	487.104
n5	dC2	ON	200hz	425.613
n5	dC2	ON	200hz	387.224
n5	dC2	ON	200hz	601.261
n5	dC2	ON	200hz	481.01
n5	dC2	ON	200hz	418.958
n5	dC2	ON	200hz	522.811
n5	dC2	ON	200hz	473.139
n5	dC2	ON	200hz	674.446
n5	dC2	ON	200hz	622.341
n5	dC2	ON	200hz	875.476
n5	dC2	ON	200hz	434.396
n5	dC2	ON	200hz	482.397
n5	dC2	ON	200hz	583.244
n5	dC2	ON	200hz	478.641
n10	dC3	ON	200hz	443.772
n10	dC3	ON	200hz	345.991
n10	dC3	ON	200hz	511.337
n10	dC3	ON	200hz	524.346
n10	dC3	ON	200hz	512.607
n10	dC3	ON	200hz	456.312
n10	dC3	ON	200hz	418.315
n10	dC3	ON	200hz	399.424
n10	dC3	ON	200hz	521.081
n10	dC3	ON	200hz	427.969
n10	dC3	ON	200hz	422.51
n10	dC3	ON	200hz	402.156
n10	dC3	ON	200hz	475.748
n10	dC3	ON	200hz	579.383
n10	dC3	ON	200hz	421.577
n10	dC3	ON	200hz	503.798
n10	dC3	ON	200hz	454.993
n10	dC3	ON	200hz	436.439
n10	dC3	ON	200hz	764.968
n10	dC3	ON	200hz	464.807
n1	dC3	ON	200hz	451.034
n1	dC3	ON	200hz	497.498
n1	dC3	ON	200hz	503.332
n1	dC3	ON	200hz	493.292
n1	dC3	ON	200hz	488.657
n1	dC3	ON	200hz	608.535
n1	dC3	ON	200hz	443.494
n1	dC3	ON	200hz	435.958
n1	dC3	ON	200hz	610.235
n1	dC3	ON	200hz	497.368
n1	dC3	ON	200hz	439.457
n1	dC3	ON	200hz	468.156
n1	dC3	ON	200hz	497.981
n1	dC3	ON	200hz	434.503
n1	dC3	ON	200hz	714.733
n1	dC3	ON	200hz	607.882
n1	dC3	ON	200hz	410.027
n1	dC3	ON	200hz	471.142
n1	dC3	ON	200hz	591.562
n1	dC3	ON	200hz	458.348
n20	dC3	ON	200hz	346.649
n20	dC3	ON	200hz	440.747
n20	dC3	ON	200hz	496.327
n20	dC3	ON	200hz	492.279
n20	dC3	ON	200hz	530.36
n20	dC3	ON	200hz	521.451
n20	dC3	ON	200hz	401.234
n20	dC3	ON	200hz	371.382
n20	dC3	ON	200hz	504.662
n20	dC3	ON	200hz	427.085
n20	dC3	ON	200hz	352.308
n20	dC3	ON	200hz	411.426
n20	dC3	ON	200hz	482.102
n20	dC3	ON	200hz	419.276
n20	dC3	ON	200hz	476.354
n20	dC3	ON	200hz	538.028
n20	dC3	ON	200hz	403.93
n20	dC3	ON	200hz	378.761
n20	dC3	ON	200hz	544.158
n20	dC3	ON	200hz	392.138
n5	dC3	ON	200hz	492.786
n5	dC3	ON	200hz	467.513
n5	dC3	ON	200hz	467.313
n5	dC3	ON	200hz	481.213
n5	dC3	ON	200hz	604.765
n5	dC3	ON	200hz	522.135
n5	dC3	ON	200hz	413.671
n5	dC3	ON	200hz	402.796
n5	dC3	ON	200hz	546.025
n5	dC3	ON	200hz	592.102
n5	dC3	ON	200hz	386.975
n5	dC3	ON	200hz	430.331
n5	dC3	ON	200hz	450.295
n5	dC3	ON	200hz	438.19
n5	dC3	ON	200hz	469.924
n5	dC3	ON	200hz	457.074
n5	dC3	ON	200hz	432.308
n5	dC3	ON	200hz	456.065
n5	dC3	ON	200hz	481.808
n5	dC3	ON	200hz	436.383
n10	dC1	ON	1000hz	549.544
n10	dC1	ON	1000hz	480.733
n10	dC1	ON	1000hz	529.349
n10	dC1	ON	1000hz	528.338
n10	dC1	ON	1000hz	593.593
n10	dC1	ON	1000hz	594.218
n10	dC1	ON	1000hz	447.242
n10	dC1	ON	1000hz	371.159
n10	dC1	ON	1000hz	597.642
n10	dC1	ON	1000hz	509.459
n10	dC1	ON	1000hz	476.51
n10	dC1	ON	1000hz	466.772
n10	dC1	ON	1000hz	542.864
n10	dC1	ON	1000hz	412.272
n10	dC1	ON	1000hz	399.81
n10	dC1	ON	1000hz	612.811
n10	dC1	ON	1000hz	443.802
n10	dC1	ON	1000hz	447.511
n10	dC1	ON	1000hz	535.376
n10	dC1	ON	1000hz	440.708
n1	dC1	ON	1000hz	593.732
n1	dC1	ON	1000hz	426.926
n1	dC1	ON	1000hz	538.379
n1	dC1	ON	1000hz	562.374
n1	dC1	ON	1000hz	507.352
n1	dC1	ON	1000hz	646.246
n1	dC1	ON	1000hz	573.698
n1	dC1	ON	1000hz	488.535
n1	dC1	ON	1000hz	742.871
n1	dC1	ON	1000hz	620.813
n1	dC1	ON	1000hz	436.257
n1	dC1	ON	1000hz	540.193
n1	dC1	ON	1000hz	513.338
n1	dC1	ON	1000hz	398.263
n1	dC1	ON	1000hz	854.539
n1	dC1	ON	1000hz	538.107
n1	dC1	ON	1000hz	569.106
n1	dC1	ON	1000hz	332.192
n1	dC1	ON	1000hz	726.918
n1	dC1	ON	1000hz	591.83
n20	dC1	ON	1000hz	572.433
n20	dC1	ON	1000hz	477.163
n20	dC1	ON	1000hz	557.369
n20	dC1	ON	1000hz	553.368
n20	dC1	ON	1000hz	558.214
n20	dC1	ON	1000hz	505.061
n20	dC1	ON	1000hz	588.871
n20	dC1	ON	1000hz	409.101
n20	dC1	ON	1000hz	428.557
n20	dC1	ON	1000hz	474.697
n20	dC1	ON	1000hz	440.376
n20	dC1	ON	1000hz	506.923
n20	dC1	ON	1000hz	496.328
n20	dC1	ON	1000hz	482.38
n20	dC1	ON	1000hz	534.433
n20	dC1	ON	1000hz	379.642
n20	dC1	ON	1000hz	452.358
n20	dC1	ON	1000hz	454.361
n20	dC1	ON	1000hz	568.187
n20	dC1	ON	1000hz	579.066
n5	dC1	ON	1000hz	430.408
n5	dC1	ON	1000hz	571.307
n5	dC1	ON	1000hz	650.43
n5	dC1	ON	1000hz	433.286
n5	dC1	ON	1000hz	500.218
n5	dC1	ON	1000hz	515.899
n5	dC1	ON	1000hz	545.863
n5	dC1	ON	1000hz	346.828
n5	dC1	ON	1000hz	587.777
n5	dC1	ON	1000hz	458.145
n5	dC1	ON	1000hz	460.488
n5	dC1	ON	1000hz	474.424
n5	dC1	ON	1000hz	540.75
n5	dC1	ON	1000hz	419.277
n5	dC1	ON	1000hz	566.75
n5	dC1	ON	1000hz	571.007
n5	dC1	ON	1000hz	798.671
n5	dC1	ON	1000hz	377.72
n5	dC1	ON	1000hz	395.673
n5	dC1	ON	1000hz	394.605
n10	dC2	ON	1000hz	394.239
n10	dC2	ON	1000hz	427.779
n10	dC2	ON	1000hz	547.529
n10	dC2	ON	1000hz	533.515
n10	dC2	ON	1000hz	409.199
n10	dC2	ON	1000hz	529.667
n10	dC2	ON	1000hz	509.044
n10	dC2	ON	1000hz	377.094
n10	dC2	ON	1000hz	525.577
n10	dC2	ON	1000hz	521.615
n10	dC2	ON	1000hz	419.701
n10	dC2	ON	1000hz	434.736
n10	dC2	ON	1000hz	430.284
n10	dC2	ON	1000hz	434.424
n10	dC2	ON	1000hz	499.402
n10	dC2	ON	1000hz	449.392
n10	dC2	ON	1000hz	428.982
n10	dC2	ON	1000hz	318.358
n10	dC2	ON	1000hz	530.46
n10	dC2	ON	1000hz	466.199
n1	dC2	ON	1000hz	427.382
n1	dC2	ON	1000hz	434.206
n1	dC2	ON	1000hz	605.401
n1	dC2	ON	1000hz	524.346
n1	dC2	ON	1000hz	514.485
n1	dC2	ON	1000hz	529.335
n1	dC2	ON	1000hz	505.063
n1	dC2	ON	1000hz	409.963
n1	dC2	ON	1000hz	484.183
n1	dC2	ON	1000hz	458.826
n1	dC2	ON	1000hz	519.075
n1	dC2	ON	1000hz	442.827
n1	dC2	ON	1000hz	520.343
n1	dC2	ON	1000hz	527.349
n1	dC2	ON	1000hz	544.656
n1	dC2	ON	1000hz	457.513
n1	dC2	ON	1000hz	491.32
n1	dC2	ON	1000hz	417.891
n1	dC2	ON	1000hz	521.745
n1	dC2	ON	1000hz	490.266
n20	dC2	ON	1000hz	394.971
n20	dC2	ON	1000hz	371.681
n20	dC2	ON	1000hz	552.08
n20	dC2	ON	1000hz	497.813
n20	dC2	ON	1000hz	483.961
n20	dC2	ON	1000hz	449.029
n20	dC2	ON	1000hz	571.191
n20	dC2	ON	1000hz	395.718
n20	dC2	ON	1000hz	484.35
n20	dC2	ON	1000hz	553.842
n20	dC2	ON	1000hz	451.13
n20	dC2	ON	1000hz	464.269
n20	dC2	ON	1000hz	458.155
n20	dC2	ON	1000hz	447.768
n20	dC2	ON	1000hz	454.508
n20	dC2	ON	1000hz	478.486
n20	dC2	ON	1000hz	445.823
n20	dC2	ON	1000hz	304.896
n20	dC2	ON	1000hz	580.686
n20	dC2	ON	1000hz	505.207
n5	dC2	ON	1000hz	418.883
n5	dC2	ON	1000hz	452.743
n5	dC2	ON	1000hz	543.349
n5	dC2	ON	1000hz	687.514
n5	dC2	ON	1000hz	455.944
n5	dC2	ON	1000hz	457.035
n5	dC2	ON	1000hz	543.908
n5	dC2	ON	1000hz	442.575
n5	dC2	ON	1000hz	517.384
n5	dC2	ON	1000hz	403.526
n5	dC2	ON	1000hz	418.772
n5	dC2	ON	1000hz	482.395
n5	dC2	ON	1000hz	507.334
n5	dC2	ON	1000hz	450.677
n5	dC2	ON	1000hz	440.192
n5	dC2	ON	1000hz	507.709
n5	dC2	ON	1000hz	535.692
n5	dC2	ON	1000hz	460.179
n5	dC2	ON	1000hz	581.334
n5	dC2	ON	1000hz	433.449
n10	dC3	ON	1000hz	420.509
n10	dC3	ON	1000hz	410.486
n10	dC3	ON	1000hz	503.628
n10	dC3	ON	1000hz	404.266
n10	dC3	ON	1000hz	549.215
n10	dC3	ON	1000hz	534.231
n10	dC3	ON	1000hz	531.275
n10	dC3	ON	1000hz	361.875
n10	dC3	ON	1000hz	428.911
n10	dC3	ON	1000hz	475.608
n10	dC3	ON	1000hz	450.87
n10	dC3	ON	1000hz	383.134
n10	dC3	ON	1000hz	495.709
n10	dC3	ON	1000hz	489.802
n10	dC3	ON	1000hz	625.664
n10	dC3	ON	1000hz	544.378
n10	dC3	ON	1000hz	466.079
n10	dC3	ON	1000hz	374.762
n10	dC3	ON	1000hz	542.19
n10	dC3	ON	1000hz	450.055
n1	dC3	ON	1000hz	451.06
n1	dC3	ON	1000hz	539.05
n1	dC3	ON	1000hz	601.904
n1	dC3	ON	1000hz	488.325
n1	dC3	ON	1000hz	522.688
n1	dC3	ON	1000hz	530.716
n1	dC3	ON	1000hz	429.751
n1	dC3	ON	1000hz	415.113
n1	dC3	ON	1000hz	637.639
n1	dC3	ON	1000hz	514.223
n1	dC3	ON	1000hz	427.357
n1	dC3	ON	1000hz	467.335
n1	dC3	ON	1000hz	508.336
n1	dC3	ON	1000hz	508.228
n1	dC3	ON	1000hz	401.248
n1	dC3	ON	1000hz	501.256
n1	dC3	ON	1000hz	494.126
n1	dC3	ON	1000hz	389.535
n1	dC3	ON	1000hz	610.934
n1	dC3	ON	1000hz	434.361
n20	dC3	ON	1000hz	315.026
n20	dC3	ON	1000hz	504.182
n20	dC3	ON	1000hz	523.349
n20	dC3	ON	1000hz	451.297
n20	dC3	ON	1000hz	481.098
n20	dC3	ON	1000hz	522.635
n20	dC3	ON	1000hz	433.339
n20	dC3	ON	1000hz	359.831
n20	dC3	ON	1000hz	513.664
n20	dC3	ON	1000hz	498.625
n20	dC3	ON	1000hz	401.12
n20	dC3	ON	1000hz	402.389
n20	dC3	ON	1000hz	505.336
n20	dC3	ON	1000hz	456.3
n20	dC3	ON	1000hz	657.973
n20	dC3	ON	1000hz	506.706
n20	dC3	ON	1000hz	450.013
n20	dC3	ON	1000hz	366.599
n20	dC3	ON	1000hz	431.746
n20	dC3	ON	1000hz	465.611
n5	dC3	ON	1000hz	395.708
n5	dC3	ON	1000hz	675.951
n5	dC3	ON	1000hz	550.362
n5	dC3	ON	1000hz	531.351
n5	dC3	ON	1000hz	434.936
n5	dC3	ON	1000hz	479.847
n5	dC3	ON	1000hz	392.973
n5	dC3	ON	1000hz	441.588
n5	dC3	ON	1000hz	544.308
n5	dC3	ON	1000hz	422.586
n5	dC3	ON	1000hz	407.454
n5	dC3	ON	1000hz	378.156
n5	dC3	ON	1000hz	516.1
n5	dC3	ON	1000hz	613.435
n5	dC3	ON	1000hz	565.359
n5	dC3	ON	1000hz	441.587
n5	dC3	ON	1000hz	560.113
n5	dC3	ON	1000hz	431.817
n5	dC3	ON	1000hz	476.274
n5	dC3	ON	1000hz	459.195
n10	dC1	ON	2000hz	413.254
n10	dC1	ON	2000hz	434.608
n10	dC1	ON	2000hz	712.469
n10	dC1	ON	2000hz	538.886
n10	dC1	ON	2000hz	452.39
n10	dC1	ON	2000hz	433.787
n10	dC1	ON	2000hz	472.028
n10	dC1	ON	2000hz	433.983
n10	dC1	ON	2000hz	503.574
n10	dC1	ON	2000hz	626.899
n10	dC1	ON	2000hz	370.09
n10	dC1	ON	2000hz	349.529
n10	dC1	ON	2000hz	463.305
n10	dC1	ON	2000hz	491.377
n10	dC1	ON	2000hz	457.604
n10	dC1	ON	2000hz	441.686
n10	dC1	ON	2000hz	486.722
n10	dC1	ON	2000hz	429.576
n10	dC1	ON	2000hz	498.522
n10	dC1	ON	2000hz	515.719
n1	dC1	ON	2000hz	452.453
n1	dC1	ON	2000hz	428.432
n1	dC1	ON	2000hz	575.379
n1	dC1	ON	2000hz	507.983
n1	dC1	ON	2000hz	738.251
n1	dC1	ON	2000hz	623.318
n1	dC1	ON	2000hz	418.092
n1	dC1	ON	2000hz	473.038
n1	dC1	ON	2000hz	560.245
n1	dC1	ON	2000hz	444.578
n1	dC1	ON	2000hz	598.714
n1	dC1	ON	2000hz	522.881
n1	dC1	ON	2000hz	532.351
n1	dC1	ON	2000hz	426.28
n1	dC1	ON	2000hz	700.633
n1	dC1	ON	2000hz	536.022
n1	dC1	ON	2000hz	457.946
n1	dC1	ON	2000hz	401.572
n1	dC1	ON	2000hz	592.805
n1	dC1	ON	2000hz	478.833
n20	dC1	ON	2000hz	427.311
n20	dC1	ON	2000hz	333.264
n20	dC1	ON	2000hz	584.385
n20	dC1	ON	2000hz	520.343
n20	dC1	ON	2000hz	745.521
n20	dC1	ON	2000hz	361.379
n20	dC1	ON	2000hz	384.76
n20	dC1	ON	2000hz	515.911
n20	dC1	ON	2000hz	571.198
n20	dC1	ON	2000hz	459.111
n20	dC1	ON	2000hz	414.687
n20	dC1	ON	2000hz	349.422
n20	dC1	ON	2000hz	545.36
n20	dC1	ON	2000hz	545.865
n20	dC1	ON	2000hz	500.283
n20	dC1	ON	2000hz	424.499
n20	dC1	ON	2000hz	433.322
n20	dC1	ON	2000hz	458.711
n20	dC1	ON	2000hz	551.88
n20	dC1	ON	2000hz	523.054
n5	dC1	ON	2000hz	671.388
n5	dC1	ON	2000hz	434.229
n5	dC1	ON	2000hz	572.38
n5	dC1	ON	2000hz	570.535
n5	dC1	ON	2000hz	598.403
n5	dC1	ON	2000hz	450.567
n5	dC1	ON	2000hz	473.855
n5	dC1	ON	2000hz	415.691
n5	dC1	ON	2000hz	551.716
n5	dC1	ON	2000hz	658
n5	dC1	ON	2000hz	462.089
n5	dC1	ON	2000hz	460.009
n5	dC1	ON	2000hz	531.476
n5	dC1	ON	2000hz	479.832
n5	dC1	ON	2000hz	424.106
n5	dC1	ON	2000hz	443.238
n5	dC1	ON	2000hz	479.175
n5	dC1	ON	2000hz	595.958
n5	dC1	ON	2000hz	488.263
n5	dC1	ON	2000hz	729.56
n10	dC2	ON	2000hz	421.792
n10	dC2	ON	2000hz	436.945
n10	dC2	ON	2000hz	628.751
n10	dC2	ON	2000hz	564.21
n10	dC2	ON	2000hz	536.553
n10	dC2	ON	2000hz	417.416
n10	dC2	ON	2000hz	411.359
n10	dC2	ON	2000hz	396.567
n10	dC2	ON	2000hz	494.922
n10	dC2	ON	2000hz	449.518
n10	dC2	ON	2000hz	419.242
n10	dC2	ON	2000hz	402.69
n10	dC2	ON	2000hz	444.294
n10	dC2	ON	2000hz	459.303
n10	dC2	ON	2000hz	629.763
n10	dC2	ON	2000hz	422.456
n10	dC2	ON	2000hz	398.018
n10	dC2	ON	2000hz	410
n10	dC2	ON	2000hz	588.169
n10	dC2	ON	2000hz	441.219
n1	dC2	ON	2000hz	415.079
n1	dC2	ON	2000hz	463.173
n1	dC2	ON	2000hz	437.288
n1	dC2	ON	2000hz	531.633
n1	dC2	ON	2000hz	671.792
n1	dC2	ON	2000hz	400.896
n1	dC2	ON	2000hz	414.259
n1	dC2	ON	2000hz	426.147
n1	dC2	ON	2000hz	557.051
n1	dC2	ON	2000hz	558.017
n1	dC2	ON	2000hz	348.585
n1	dC2	ON	2000hz	304.15
n1	dC2	ON	2000hz	521.343
n1	dC2	ON	2000hz	439.291
n1	dC2	ON	2000hz	454.223
n1	dC2	ON	2000hz	449.605
n1	dC2	ON	2000hz	432.313
n1	dC2	ON	2000hz	432.125
n1	dC2	ON	2000hz	587.186
n1	dC2	ON	2000hz	531.509
n20	dC2	ON	2000hz	378.016
n20	dC2	ON	2000hz	390.541
n20	dC2	ON	2000hz	451.297
n20	dC2	ON	2000hz	465.307
n20	dC2	ON	2000hz	520.684
n20	dC2	ON	2000hz	549.553
n20	dC2	ON	2000hz	409.257
n20	dC2	ON	2000hz	408.37
n20	dC2	ON	2000hz	582.692
n20	dC2	ON	2000hz	431.817
n20	dC2	ON	2000hz	410.604
n20	dC2	ON	2000hz	423.587
n20	dC2	ON	2000hz	423.279
n20	dC2	ON	2000hz	433.124
n20	dC2	ON	2000hz	511.469
n20	dC2	ON	2000hz	407.379
n20	dC2	ON	2000hz	329.889
n20	dC2	ON	2000hz	420.221
n20	dC2	ON	2000hz	480.763
n20	dC2	ON	2000hz	497.501
n5	dC2	ON	2000hz	460.024
n5	dC2	ON	2000hz	558.187
n5	dC2	ON	2000hz	546.361
n5	dC2	ON	2000hz	491.029
n5	dC2	ON	2000hz	569.047
n5	dC2	ON	2000hz	487.394
n5	dC2	ON	2000hz	364.759
n5	dC2	ON	2000hz	404.135
n5	dC2	ON	2000hz	538.062
n5	dC2	ON	2000hz	538.853
n5	dC2	ON	2000hz	396.254
n5	dC2	ON	2000hz	441.602
n5	dC2	ON	2000hz	447.296
n5	dC2	ON	2000hz	436.287
n5	dC2	ON	2000hz	466.197
n5	dC2	ON	2000hz	593.109
n5	dC2	ON	2000hz	442.26
n5	dC2	ON	2000hz	449.115
n5	dC2	ON	2000hz	522.726
n5	dC2	ON	2000hz	394.562
n10	dC3	ON	2000hz	378.149
n10	dC3	ON	2000hz	544.255
n10	dC3	ON	2000hz	410.269
n10	dC3	ON	2000hz	390.258
n10	dC3	ON	2000hz	572.068
n10	dC3	ON	2000hz	437.242
n10	dC3	ON	2000hz	389.769
n10	dC3	ON	2000hz	420.55
n10	dC3	ON	2000hz	639.242
n10	dC3	ON	2000hz	410.146
n10	dC3	ON	2000hz	451.495
n10	dC3	ON	2000hz	396.406
n10	dC3	ON	2000hz	515.138
n10	dC3	ON	2000hz	458.796
n10	dC3	ON	2000hz	475.025
n10	dC3	ON	2000hz	450.449
n10	dC3	ON	2000hz	372.331
n10	dC3	ON	2000hz	425.388
n10	dC3	ON	2000hz	696.492
n10	dC3	ON	2000hz	777.023
n1	dC3	ON	2000hz	419.873
n1	dC3	ON	2000hz	462.601
n1	dC3	ON	2000hz	524.347
n1	dC3	ON	2000hz	506.337
n1	dC3	ON	2000hz	514.436
n1	dC3	ON	2000hz	542.525
n1	dC3	ON	2000hz	437.492
n1	dC3	ON	2000hz	419.656
n1	dC3	ON	2000hz	633.302
n1	dC3	ON	2000hz	457.241
n1	dC3	ON	2000hz	435.92
n1	dC3	ON	2000hz	434.718
n1	dC3	ON	2000hz	492.326
n1	dC3	ON	2000hz	515.072
n1	dC3	ON	2000hz	554.616
n1	dC3	ON	2000hz	535.035
n1	dC3	ON	2000hz	411.375
n1	dC3	ON	2000hz	428.97
n1	dC3	ON	2000hz	607.462
n1	dC3	ON	2000hz	385.369
n20	dC3	ON	2000hz	395.853
n20	dC3	ON	2000hz	609.246
n20	dC3	ON	2000hz	481.319
n20	dC3	ON	2000hz	495.331
n20	dC3	ON	2000hz	751.703
n20	dC3	ON	2000hz	510.735
n20	dC3	ON	2000hz	374.116
n20	dC3	ON	2000hz	404.747
n20	dC3	ON	2000hz	544.401
n20	dC3	ON	2000hz	442.525
n20	dC3	ON	2000hz	396.349
n20	dC3	ON	2000hz	348.822
n20	dC3	ON	2000hz	468.173
n20	dC3	ON	2000hz	417.281
n20	dC3	ON	2000hz	467.454
n20	dC3	ON	2000hz	545.178
n20	dC3	ON	2000hz	369.362
n20	dC3	ON	2000hz	408.836
n20	dC3	ON	2000hz	454.177
n20	dC3	ON	2000hz	458.788
n5	dC3	ON	2000hz	377.883
n5	dC3	ON	2000hz	403.71
n5	dC3	ON	2000hz	498.332
n5	dC3	ON	2000hz	524.206
n5	dC3	ON	2000hz	658.524
n5	dC3	ON	2000hz	474.445
n5	dC3	ON	2000hz	373.774
n5	dC3	ON	2000hz	450.257
n5	dC3	ON	2000hz	567.333
n5	dC3	ON	2000hz	513.077
n5	dC3	ON	2000hz	713.093
n5	dC3	ON	2000hz	398.556
n5	dC3	ON	2000hz	409.271
n5	dC3	ON	2000hz	508.336
n5	dC3	ON	2000hz	567.833
n5	dC3	ON	2000hz	389.001
n5	dC3	ON	2000hz	427.494
n5	dC3	ON	2000hz	427.663
n5	dC3	ON	2000hz	528.222
n5	dC3	ON	2000hz	459.939
n10	dC1	OFF	nosound	1336.88
n10	dC1	OFF	nosound	564.179
n10	dC1	OFF	nosound	1448.96
n10	dC1	OFF	nosound	1251.83
n10	dC1	OFF	nosound	1315.99
n10	dC1	OFF	nosound	679.383
n10	dC1	OFF	nosound	538.689
n10	dC1	OFF	nosound	418.028
n10	dC1	OFF	nosound	823.373
n10	dC1	OFF	nosound	544.753
n10	dC1	OFF	nosound	831.549
n10	dC1	OFF	nosound	515.953
n10	dC1	OFF	nosound	982.649
n10	dC1	OFF	nosound	860.417
n10	dC1	OFF	nosound	659.26
n10	dC1	OFF	nosound	537.766
n10	dC1	OFF	nosound	495.577
n10	dC1	OFF	nosound	474.814
n10	dC1	OFF	nosound	955.181
n10	dC1	OFF	nosound	498.661
n1	dC1	OFF	nosound	644.424
n1	dC1	OFF	nosound	485.917
n1	dC1	OFF	nosound	1091.72
n1	dC1	OFF	nosound	978.646
n1	dC1	OFF	nosound	977.381
n1	dC1	OFF	nosound	635.949
n1	dC1	OFF	nosound	706.198
n1	dC1	OFF	nosound	962.282
n1	dC1	OFF	nosound	1243.47
n1	dC1	OFF	nosound	566.163
n1	dC1	OFF	nosound	688.454
n1	dC1	OFF	nosound	488.468
n1	dC1	OFF	nosound	905.596
n1	dC1	OFF	nosound	754.497
n1	dC1	OFF	nosound	969.807
n1	dC1	OFF	nosound	623.867
n1	dC1	OFF	nosound	1593.38
n1	dC1	OFF	nosound	522.343
n1	dC1	OFF	nosound	947.153
n1	dC1	OFF	nosound	694.686
n20	dC1	OFF	nosound	593.391
n20	dC1	OFF	nosound	439.392
n20	dC1	OFF	nosound	1114.74
n20	dC1	OFF	nosound	1081.72
n20	dC1	OFF	nosound	755.76
n20	dC1	OFF	nosound	711.513
n20	dC1	OFF	nosound	562.577
n20	dC1	OFF	nosound	428.294
n20	dC1	OFF	nosound	698.479
n20	dC1	OFF	nosound	552.458
n20	dC1	OFF	nosound	753.496
n20	dC1	OFF	nosound	461.809
n20	dC1	OFF	nosound	1999.38
n20	dC1	OFF	nosound	1057.7
n20	dC1	OFF	nosound	973.889
n20	dC1	OFF	nosound	466.532
n20	dC1	OFF	nosound	543.562
n20	dC1	OFF	nosound	518.917
n20	dC1	OFF	nosound	884.102
n20	dC1	OFF	nosound	562.642
n5	dC1	OFF	nosound	502.331
n5	dC1	OFF	nosound	492.449
n5	dC1	OFF	nosound	743.491
n5	dC1	OFF	nosound	1096.72
n5	dC1	OFF	nosound	1504.91
n5	dC1	OFF	nosound	848.729
n5	dC1	OFF	nosound	607.75
n5	dC1	OFF	nosound	450.218
n5	dC1	OFF	nosound	744.048
n5	dC1	OFF	nosound	520.682
n5	dC1	OFF	nosound	661.515
n5	dC1	OFF	nosound	460.677
n5	dC1	OFF	nosound	987.855
n5	dC1	OFF	nosound	738.487
n5	dC1	OFF	nosound	634.138
n5	dC1	OFF	nosound	526.131
n5	dC1	OFF	nosound	453.217
n5	dC1	OFF	nosound	465.514
n5	dC1	OFF	nosound	1300.6
n5	dC1	OFF	nosound	480.96
n10	dC2	OFF	nosound	539.357
n10	dC2	OFF	nosound	539.33
n10	dC2	OFF	nosound	823.543
n10	dC2	OFF	nosound	914.605
n10	dC2	OFF	nosound	956.058
n10	dC2	OFF	nosound	627.893
n10	dC2	OFF	nosound	620.613
n10	dC2	OFF	nosound	481.232
n10	dC2	OFF	nosound	673.986
n10	dC2	OFF	nosound	559.005
n10	dC2	OFF	nosound	553.364
n10	dC2	OFF	nosound	418.828
n10	dC2	OFF	nosound	644.433
n10	dC2	OFF	nosound	641.423
n10	dC2	OFF	nosound	906.776
n10	dC2	OFF	nosound	510.113
n10	dC2	OFF	nosound	557.721
n10	dC2	OFF	nosound	485.597
n10	dC2	OFF	nosound	758.351
n10	dC2	OFF	nosound	683.867
n1	dC2	OFF	nosound	447.296
n1	dC2	OFF	nosound	450.291
n1	dC2	OFF	nosound	943.494
n1	dC2	OFF	nosound	802.53
n1	dC2	OFF	nosound	624.686
n1	dC2	OFF	nosound	1814.3
n1	dC2	OFF	nosound	569.457
n1	dC2	OFF	nosound	465.234
n1	dC2	OFF	nosound	823.768
n1	dC2	OFF	nosound	678.374
n1	dC2	OFF	nosound	865.571
n1	dC2	OFF	nosound	555.029
n1	dC2	OFF	nosound	915.138
n1	dC2	OFF	nosound	641.423
n1	dC2	OFF	nosound	632.224
n1	dC2	OFF	nosound	536.398
n1	dC2	OFF	nosound	704.96
n1	dC2	OFF	nosound	538.829
n1	dC2	OFF	nosound	1085.95
n1	dC2	OFF	nosound	578.858
n20	dC2	OFF	nosound	814.538
n20	dC2	OFF	nosound	435.26
n20	dC2	OFF	nosound	1081.56
n20	dC2	OFF	nosound	690.455
n20	dC2	OFF	nosound	668.999
n20	dC2	OFF	nosound	576.047
n20	dC2	OFF	nosound	493.27
n20	dC2	OFF	nosound	455.204
n20	dC2	OFF	nosound	761.463
n20	dC2	OFF	nosound	517.963
n20	dC2	OFF	nosound	516.341
n20	dC2	OFF	nosound	411.435
n20	dC2	OFF	nosound	965.216
n20	dC2	OFF	nosound	785.519
n20	dC2	OFF	nosound	905.065
n20	dC2	OFF	nosound	533.793
n20	dC2	OFF	nosound	532.697
n20	dC2	OFF	nosound	487.424
n20	dC2	OFF	nosound	747.447
n20	dC2	OFF	nosound	508.755
n5	dC2	OFF	nosound	697.624
n5	dC2	OFF	nosound	498.432
n5	dC2	OFF	nosound	947.625
n5	dC2	OFF	nosound	776.084
n5	dC2	OFF	nosound	1004.71
n5	dC2	OFF	nosound	716.786
n5	dC2	OFF	nosound	596.382
n5	dC2	OFF	nosound	514.319
n5	dC2	OFF	nosound	616.289
n5	dC2	OFF	nosound	657.64
n5	dC2	OFF	nosound	589.389
n5	dC2	OFF	nosound	385.188
n5	dC2	OFF	nosound	1070.38
n5	dC2	OFF	nosound	626.412
n5	dC2	OFF	nosound	899.173
n5	dC2	OFF	nosound	558.705
n5	dC2	OFF	nosound	472.808
n5	dC2	OFF	nosound	494.202
n5	dC2	OFF	nosound	708
n5	dC2	OFF	nosound	485.697
n10	dC3	OFF	nosound	942.623
n10	dC3	OFF	nosound	531.903
n10	dC3	OFF	nosound	1083.84
n10	dC3	OFF	nosound	1396.92
n10	dC3	OFF	nosound	833.477
n10	dC3	OFF	nosound	615.669
n10	dC3	OFF	nosound	475.262
n10	dC3	OFF	nosound	549.886
n10	dC3	OFF	nosound	670.54
n10	dC3	OFF	nosound	497.281
n10	dC3	OFF	nosound	632.418
n10	dC3	OFF	nosound	520.102
n10	dC3	OFF	nosound	1112.73
n10	dC3	OFF	nosound	886.585
n10	dC3	OFF	nosound	811.176
n10	dC3	OFF	nosound	520.239
n10	dC3	OFF	nosound	521.449
n10	dC3	OFF	nosound	427.642
n10	dC3	OFF	nosound	834.381
n10	dC3	OFF	nosound	552.019
n1	dC3	OFF	nosound	500.332
n1	dC3	OFF	nosound	475.209
n1	dC3	OFF	nosound	1141.75
n1	dC3	OFF	nosound	912.088
n1	dC3	OFF	nosound	995.986
n1	dC3	OFF	nosound	529.493
n1	dC3	OFF	nosound	488.963
n1	dC3	OFF	nosound	479.3
n1	dC3	OFF	nosound	759.883
n1	dC3	OFF	nosound	467.398
n1	dC3	OFF	nosound	836.553
n1	dC3	OFF	nosound	516.372
n1	dC3	OFF	nosound	632.417
n1	dC3	OFF	nosound	921.835
n1	dC3	OFF	nosound	763.375
n1	dC3	OFF	nosound	512.413
n1	dC3	OFF	nosound	578.091
n1	dC3	OFF	nosound	508.725
n1	dC3	OFF	nosound	695.698
n1	dC3	OFF	nosound	632.777
n20	dC3	OFF	nosound	702.111
n20	dC3	OFF	nosound	474.373
n20	dC3	OFF	nosound	858.567
n20	dC3	OFF	nosound	1001.66
n20	dC3	OFF	nosound	985.976
n20	dC3	OFF	nosound	552.507
n20	dC3	OFF	nosound	592.421
n20	dC3	OFF	nosound	459.13
n20	dC3	OFF	nosound	734.206
n20	dC3	OFF	nosound	593.47
n20	dC3	OFF	nosound	460.41
n20	dC3	OFF	nosound	446.217
n20	dC3	OFF	nosound	951.628
n20	dC3	OFF	nosound	961.988
n20	dC3	OFF	nosound	1187.39
n20	dC3	OFF	nosound	541.568
n20	dC3	OFF	nosound	529.347
n20	dC3	OFF	nosound	442.142
n20	dC3	OFF	nosound	695.858
n20	dC3	OFF	nosound	510.666
n5	dC3	OFF	nosound	467.308
n5	dC3	OFF	nosound	516.373
n5	dC3	OFF	nosound	633.418
n5	dC3	OFF	nosound	785.518
n5	dC3	OFF	nosound	632.253
n5	dC3	OFF	nosound	602.457
n5	dC3	OFF	nosound	464.128
n5	dC3	OFF	nosound	490.42
n5	dC3	OFF	nosound	2188.53
n5	dC3	OFF	nosound	666.202
n5	dC3	OFF	nosound	668.44
n5	dC3	OFF	nosound	401.221
n5	dC3	OFF	nosound	1093.72
n5	dC3	OFF	nosound	678.448
n5	dC3	OFF	nosound	811.544
n5	dC3	OFF	nosound	504.157
n5	dC3	OFF	nosound	485.492
n5	dC3	OFF	nosound	577.817
n5	dC3	OFF	nosound	766.697
n5	dC3	OFF	nosound	513.83
n10	dC1	OFF	200hz	371.69
n10	dC1	OFF	200hz	608.874
n10	dC1	OFF	200hz	833.658
n10	dC1	OFF	200hz	702.465
n10	dC1	OFF	200hz	726.041
n10	dC1	OFF	200hz	557.942
n10	dC1	OFF	200hz	565.279
n10	dC1	OFF	200hz	466.261
n10	dC1	OFF	200hz	866.621
n10	dC1	OFF	200hz	609.962
n10	dC1	OFF	200hz	432.285
n10	dC1	OFF	200hz	625.997
n10	dC1	OFF	200hz	1324.04
n10	dC1	OFF	200hz	716.476
n10	dC1	OFF	200hz	729.4
n10	dC1	OFF	200hz	586.25
n10	dC1	OFF	200hz	841.393
n10	dC1	OFF	200hz	522.261
n10	dC1	OFF	200hz	882.303
n10	dC1	OFF	200hz	552.649
n1	dC1	OFF	200hz	489.322
n1	dC1	OFF	200hz	481.888
n1	dC1	OFF	200hz	1315.87
n1	dC1	OFF	200hz	635.423
n1	dC1	OFF	200hz	531.822
n1	dC1	OFF	200hz	767.709
n1	dC1	OFF	200hz	475.403
n1	dC1	OFF	200hz	499.63
n1	dC1	OFF	200hz	915.151
n1	dC1	OFF	200hz	585.6
n1	dC1	OFF	200hz	533.352
n1	dC1	OFF	200hz	561.662
n1	dC1	OFF	200hz	640.423
n1	dC1	OFF	200hz	753.496
n1	dC1	OFF	200hz	563.592
n1	dC1	OFF	200hz	658.909
n1	dC1	OFF	200hz	1225.06
n1	dC1	OFF	200hz	1632.59
n1	dC1	OFF	200hz	703.545
n1	dC1	OFF	200hz	497.968
n20	dC1	OFF	200hz	454.299
n20	dC1	OFF	200hz	499.078
n20	dC1	OFF	200hz	647.811
n20	dC1	OFF	200hz	1034.68
n20	dC1	OFF	200hz	858.274
n20	dC1	OFF	200hz	647.656
n20	dC1	OFF	200hz	546.875
n20	dC1	OFF	200hz	578.171
n20	dC1	OFF	200hz	1098.22
n20	dC1	OFF	200hz	529.627
n20	dC1	OFF	200hz	514.34
n20	dC1	OFF	200hz	632.249
n20	dC1	OFF	200hz	834.911
n20	dC1	OFF	200hz	545.448
n20	dC1	OFF	200hz	560.84
n20	dC1	OFF	200hz	639.2
n20	dC1	OFF	200hz	474.351
n20	dC1	OFF	200hz	526.596
n20	dC1	OFF	200hz	782.261
n20	dC1	OFF	200hz	610.014
n5	dC1	OFF	200hz	468.31
n5	dC1	OFF	200hz	524.068
n5	dC1	OFF	200hz	769.509
n5	dC1	OFF	200hz	1058.54
n5	dC1	OFF	200hz	520.352
n5	dC1	OFF	200hz	629.726
n5	dC1	OFF	200hz	592.778
n5	dC1	OFF	200hz	546.701
n5	dC1	OFF	200hz	766.938
n5	dC1	OFF	200hz	607.177
n5	dC1	OFF	200hz	460.304
n5	dC1	OFF	200hz	436.876
n5	dC1	OFF	200hz	864.571
n5	dC1	OFF	200hz	727.48
n5	dC1	OFF	200hz	609.003
n5	dC1	OFF	200hz	544.288
n5	dC1	OFF	200hz	715.353
n5	dC1	OFF	200hz	745.675
n5	dC1	OFF	200hz	663.288
n5	dC1	OFF	200hz	719.44
n10	dC2	OFF	200hz	395.26
n10	dC2	OFF	200hz	419.259
n10	dC2	OFF	200hz	817.397
n10	dC2	OFF	200hz	591.389
n10	dC2	OFF	200hz	517.06
n10	dC2	OFF	200hz	677.361
n10	dC2	OFF	200hz	506.505
n10	dC2	OFF	200hz	567.286
n10	dC2	OFF	200hz	665.565
n10	dC2	OFF	200hz	505.807
n10	dC2	OFF	200hz	535.353
n10	dC2	OFF	200hz	508.108
n10	dC2	OFF	200hz	693.491
n10	dC2	OFF	200hz	1068.94
n10	dC2	OFF	200hz	508.703
n10	dC2	OFF	200hz	545.237
n10	dC2	OFF	200hz	528.812
n10	dC2	OFF	200hz	505.496
n10	dC2	OFF	200hz	1665.25
n10	dC2	OFF	200hz	646.442
n1	dC2	OFF	200hz	412.272
n1	dC2	OFF	200hz	483.466
n1	dC2	OFF	200hz	769.509
n1	dC2	OFF	200hz	582.384
n1	dC2	OFF	200hz	617.93
n1	dC2	OFF	200hz	573.653
n1	dC2	OFF	200hz	490.016
n1	dC2	OFF	200hz	475.954
n1	dC2	OFF	200hz	682.447
n1	dC2	OFF	200hz	630.394
n1	dC2	OFF	200hz	530.35
n1	dC2	OFF	200hz	575.897
n1	dC2	OFF	200hz	572.378
n1	dC2	OFF	200hz	666.576
n1	dC2	OFF	200hz	810.938
n1	dC2	OFF	200hz	786.539
n1	dC2	OFF	200hz	565.196
n1	dC2	OFF	200hz	602.555
n1	dC2	OFF	200hz	639.051
n1	dC2	OFF	200hz	541.698
n20	dC2	OFF	200hz	349.231
n20	dC2	OFF	200hz	465.571
n20	dC2	OFF	200hz	928.615
n20	dC2	OFF	200hz	599.738
n20	dC2	OFF	200hz	745.73
n20	dC2	OFF	200hz	527.072
n20	dC2	OFF	200hz	560.758
n20	dC2	OFF	200hz	453.7
n20	dC2	OFF	200hz	663.845
n20	dC2	OFF	200hz	429.75
n20	dC2	OFF	200hz	351.767
n20	dC2	OFF	200hz	481.098
n20	dC2	OFF	200hz	901.4
n20	dC2	OFF	200hz	629.91
n20	dC2	OFF	200hz	628.474
n20	dC2	OFF	200hz	516.643
n20	dC2	OFF	200hz	735.264
n20	dC2	OFF	200hz	547.248
n20	dC2	OFF	200hz	676.137
n20	dC2	OFF	200hz	479.733
n5	dC2	OFF	200hz	440.292
n5	dC2	OFF	200hz	523.367
n5	dC2	OFF	200hz	455.301
n5	dC2	OFF	200hz	736.486
n5	dC2	OFF	200hz	582.696
n5	dC2	OFF	200hz	525.719
n5	dC2	OFF	200hz	516.309
n5	dC2	OFF	200hz	525.867
n5	dC2	OFF	200hz	866.316
n5	dC2	OFF	200hz	394.276
n5	dC2	OFF	200hz	429.282
n5	dC2	OFF	200hz	499.399
n5	dC2	OFF	200hz	457.303
n5	dC2	OFF	200hz	1099.19
n5	dC2	OFF	200hz	634.261
n5	dC2	OFF	200hz	630.86
n5	dC2	OFF	200hz	454.511
n5	dC2	OFF	200hz	530.721
n5	dC2	OFF	200hz	762.749
n5	dC2	OFF	200hz	665.664
n10	dC3	OFF	200hz	427.283
n10	dC3	OFF	200hz	382.55
n10	dC3	OFF	200hz	646.427
n10	dC3	OFF	200hz	792.522
n10	dC3	OFF	200hz	917.422
n10	dC3	OFF	200hz	515.01
n10	dC3	OFF	200hz	486.166
n10	dC3	OFF	200hz	514.719
n10	dC3	OFF	200hz	598.51
n10	dC3	OFF	200hz	543.254
n10	dC3	OFF	200hz	451.297
n10	dC3	OFF	200hz	500.336
n10	dC3	OFF	200hz	495.326
n10	dC3	OFF	200hz	558.172
n10	dC3	OFF	200hz	675.66
n10	dC3	OFF	200hz	548.982
n10	dC3	OFF	200hz	577.259
n10	dC3	OFF	200hz	434.462
n10	dC3	OFF	200hz	821.74
n10	dC3	OFF	200hz	497.534
n1	dC3	OFF	200hz	451.298
n1	dC3	OFF	200hz	443.113
n1	dC3	OFF	200hz	601.239
n1	dC3	OFF	200hz	782.56
n1	dC3	OFF	200hz	542.725
n1	dC3	OFF	200hz	625.791
n1	dC3	OFF	200hz	480.169
n1	dC3	OFF	200hz	498.795
n1	dC3	OFF	200hz	738.795
n1	dC3	OFF	200hz	591.981
n1	dC3	OFF	200hz	520.343
n1	dC3	OFF	200hz	523.675
n1	dC3	OFF	200hz	593.391
n1	dC3	OFF	200hz	873.575
n1	dC3	OFF	200hz	595.029
n1	dC3	OFF	200hz	511.192
n1	dC3	OFF	200hz	695.937
n1	dC3	OFF	200hz	501.726
n1	dC3	OFF	200hz	677.551
n1	dC3	OFF	200hz	502.542
n20	dC3	OFF	200hz	456.301
n20	dC3	OFF	200hz	501.052
n20	dC3	OFF	200hz	657.434
n20	dC3	OFF	200hz	1072.91
n20	dC3	OFF	200hz	528.538
n20	dC3	OFF	200hz	559.692
n20	dC3	OFF	200hz	563.749
n20	dC3	OFF	200hz	490.171
n20	dC3	OFF	200hz	616.26
n20	dC3	OFF	200hz	592.87
n20	dC3	OFF	200hz	490.322
n20	dC3	OFF	200hz	489.674
n20	dC3	OFF	200hz	633.418
n20	dC3	OFF	200hz	753.364
n20	dC3	OFF	200hz	583.037
n20	dC3	OFF	200hz	556.811
n20	dC3	OFF	200hz	498.614
n20	dC3	OFF	200hz	515.991
n20	dC3	OFF	200hz	549.629
n20	dC3	OFF	200hz	480.913
n5	dC3	OFF	200hz	319.21
n5	dC3	OFF	200hz	458.817
n5	dC3	OFF	200hz	611.404
n5	dC3	OFF	200hz	845.558
n5	dC3	OFF	200hz	616.731
n5	dC3	OFF	200hz	631.157
n5	dC3	OFF	200hz	561.672
n5	dC3	OFF	200hz	485.43
n5	dC3	OFF	200hz	629.952
n5	dC3	OFF	200hz	497.36
n5	dC3	OFF	200hz	391.259
n5	dC3	OFF	200hz	386.731
n5	dC3	OFF	200hz	546.361
n5	dC3	OFF	200hz	538.095
n5	dC3	OFF	200hz	532.51
n5	dC3	OFF	200hz	545.301
n5	dC3	OFF	200hz	450.277
n5	dC3	OFF	200hz	466.734
n5	dC3	OFF	200hz	832.254
n5	dC3	OFF	200hz	499.428
n10	dC1	OFF	1000hz	548.363
n10	dC1	OFF	1000hz	488.486
n10	dC1	OFF	1000hz	654.435
n10	dC1	OFF	1000hz	801.99
n10	dC1	OFF	1000hz	508.071
n10	dC1	OFF	1000hz	527.315
n10	dC1	OFF	1000hz	425.647
n10	dC1	OFF	1000hz	594.856
n10	dC1	OFF	1000hz	758.803
n10	dC1	OFF	1000hz	603.595
n10	dC1	OFF	1000hz	462.308
n10	dC1	OFF	1000hz	492.446
n10	dC1	OFF	1000hz	761.352
n10	dC1	OFF	1000hz	561.874
n10	dC1	OFF	1000hz	554.93
n10	dC1	OFF	1000hz	656.719
n10	dC1	OFF	1000hz	511.546
n10	dC1	OFF	1000hz	1206.35
n10	dC1	OFF	1000hz	609.383
n10	dC1	OFF	1000hz	547.656
n1	dC1	OFF	1000hz	315.844
n1	dC1	OFF	1000hz	562.874
n1	dC1	OFF	1000hz	2123.4
n1	dC1	OFF	1000hz	698.463
n1	dC1	OFF	1000hz	524.111
n1	dC1	OFF	1000hz	537.373
n1	dC1	OFF	1000hz	523.546
n1	dC1	OFF	1000hz	513.594
n1	dC1	OFF	1000hz	729.045
n1	dC1	OFF	1000hz	583.084
n1	dC1	OFF	1000hz	679.723
n1	dC1	OFF	1000hz	399.684
n1	dC1	OFF	1000hz	629.419
n1	dC1	OFF	1000hz	768.644
n1	dC1	OFF	1000hz	651.692
n1	dC1	OFF	1000hz	510.348
n1	dC1	OFF	1000hz	874.861
n1	dC1	OFF	1000hz	437.194
n1	dC1	OFF	1000hz	889.135
n1	dC1	OFF	1000hz	504.398
n20	dC1	OFF	1000hz	421.162
n20	dC1	OFF	1000hz	552.088
n20	dC1	OFF	1000hz	621.913
n20	dC1	OFF	1000hz	715.459
n20	dC1	OFF	1000hz	572.082
n20	dC1	OFF	1000hz	697.605
n20	dC1	OFF	1000hz	434.97
n20	dC1	OFF	1000hz	498.83
n20	dC1	OFF	1000hz	625.487
n20	dC1	OFF	1000hz	481.642
n20	dC1	OFF	1000hz	547.802
n20	dC1	OFF	1000hz	475.271
n20	dC1	OFF	1000hz	521.21
n20	dC1	OFF	1000hz	801.528
n20	dC1	OFF	1000hz	689.089
n20	dC1	OFF	1000hz	792.42
n20	dC1	OFF	1000hz	465.937
n20	dC1	OFF	1000hz	579.181
n20	dC1	OFF	1000hz	839.473
n20	dC1	OFF	1000hz	561.362
n5	dC1	OFF	1000hz	418.276
n5	dC1	OFF	1000hz	643.996
n5	dC1	OFF	1000hz	555.963
n5	dC1	OFF	1000hz	1211.52
n5	dC1	OFF	1000hz	514.121
n5	dC1	OFF	1000hz	523.104
n5	dC1	OFF	1000hz	475.312
n5	dC1	OFF	1000hz	504.656
n5	dC1	OFF	1000hz	833.692
n5	dC1	OFF	1000hz	595.555
n5	dC1	OFF	1000hz	464.306
n5	dC1	OFF	1000hz	499.058
n5	dC1	OFF	1000hz	476.315
n5	dC1	OFF	1000hz	642.699
n5	dC1	OFF	1000hz	568.568
n5	dC1	OFF	1000hz	521.581
n5	dC1	OFF	1000hz	599.388
n5	dC1	OFF	1000hz	458.724
n5	dC1	OFF	1000hz	800.99
n5	dC1	OFF	1000hz	610.362
n10	dC2	OFF	1000hz	337.223
n10	dC2	OFF	1000hz	481.814
n10	dC2	OFF	1000hz	636.228
n10	dC2	OFF	1000hz	654.448
n10	dC2	OFF	1000hz	518.483
n10	dC2	OFF	1000hz	599.891
n10	dC2	OFF	1000hz	468.937
n10	dC2	OFF	1000hz	521.626
n10	dC2	OFF	1000hz	724.597
n10	dC2	OFF	1000hz	510.21
n10	dC2	OFF	1000hz	398.262
n10	dC2	OFF	1000hz	456.901
n10	dC2	OFF	1000hz	537.353
n10	dC2	OFF	1000hz	759.179
n10	dC2	OFF	1000hz	795.284
n10	dC2	OFF	1000hz	516.791
n10	dC2	OFF	1000hz	495.32
n10	dC2	OFF	1000hz	544.959
n10	dC2	OFF	1000hz	622.982
n10	dC2	OFF	1000hz	580.133
n1	dC2	OFF	1000hz	474.312
n1	dC2	OFF	1000hz	468.538
n1	dC2	OFF	1000hz	761.902
n1	dC2	OFF	1000hz	587.387
n1	dC2	OFF	1000hz	503.317
n1	dC2	OFF	1000hz	693.455
n1	dC2	OFF	1000hz	511.772
n1	dC2	OFF	1000hz	549.229
n1	dC2	OFF	1000hz	661.218
n1	dC2	OFF	1000hz	623.13
n1	dC2	OFF	1000hz	403.265
n1	dC2	OFF	1000hz	580.095
n1	dC2	OFF	1000hz	585.385
n1	dC2	OFF	1000hz	601.233
n1	dC2	OFF	1000hz	556.76
n1	dC2	OFF	1000hz	511.516
n1	dC2	OFF	1000hz	471.052
n1	dC2	OFF	1000hz	461.087
n1	dC2	OFF	1000hz	639.61
n1	dC2	OFF	1000hz	600.912
n20	dC2	OFF	1000hz	528.348
n20	dC2	OFF	1000hz	528.633
n20	dC2	OFF	1000hz	681.766
n20	dC2	OFF	1000hz	624.412
n20	dC2	OFF	1000hz	575.356
n20	dC2	OFF	1000hz	549.987
n20	dC2	OFF	1000hz	356.353
n20	dC2	OFF	1000hz	473.742
n20	dC2	OFF	1000hz	602.055
n20	dC2	OFF	1000hz	551.988
n20	dC2	OFF	1000hz	473.312
n20	dC2	OFF	1000hz	497.215
n20	dC2	OFF	1000hz	581.384
n20	dC2	OFF	1000hz	680.546
n20	dC2	OFF	1000hz	478.233
n20	dC2	OFF	1000hz	595.843
n20	dC2	OFF	1000hz	430.971
n20	dC2	OFF	1000hz	582.459
n20	dC2	OFF	1000hz	676.786
n20	dC2	OFF	1000hz	445.851
n5	dC2	OFF	1000hz	474.313
n5	dC2	OFF	1000hz	420.137
n5	dC2	OFF	1000hz	710.597
n5	dC2	OFF	1000hz	627.371
n5	dC2	OFF	1000hz	455.959
n5	dC2	OFF	1000hz	488.971
n5	dC2	OFF	1000hz	534.195
n5	dC2	OFF	1000hz	546.701
n5	dC2	OFF	1000hz	548.747
n5	dC2	OFF	1000hz	483.375
n5	dC2	OFF	1000hz	394.26
n5	dC2	OFF	1000hz	470.846
n5	dC2	OFF	1000hz	544.508
n5	dC2	OFF	1000hz	520.343
n5	dC2	OFF	1000hz	512.476
n5	dC2	OFF	1000hz	754.903
n5	dC2	OFF	1000hz	516.113
n5	dC2	OFF	1000hz	455.363
n5	dC2	OFF	1000hz	723.647
n5	dC2	OFF	1000hz	464.15
n10	dC3	OFF	1000hz	370.244
n10	dC3	OFF	1000hz	482.597
n10	dC3	OFF	1000hz	560.37
n10	dC3	OFF	1000hz	670.123
n10	dC3	OFF	1000hz	450.867
n10	dC3	OFF	1000hz	793.409
n10	dC3	OFF	1000hz	456.936
n10	dC3	OFF	1000hz	481.032
n10	dC3	OFF	1000hz	593.459
n10	dC3	OFF	1000hz	564.185
n10	dC3	OFF	1000hz	416.276
n10	dC3	OFF	1000hz	447.953
n10	dC3	OFF	1000hz	432.285
n10	dC3	OFF	1000hz	554.603
n10	dC3	OFF	1000hz	417.056
n10	dC3	OFF	1000hz	583.739
n10	dC3	OFF	1000hz	430.534
n10	dC3	OFF	1000hz	409.573
n10	dC3	OFF	1000hz	671.259
n10	dC3	OFF	1000hz	578.659
n1	dC3	OFF	1000hz	402.267
n1	dC3	OFF	1000hz	490.054
n1	dC3	OFF	1000hz	575.458
n1	dC3	OFF	1000hz	810.593
n1	dC3	OFF	1000hz	492.345
n1	dC3	OFF	1000hz	502.048
n1	dC3	OFF	1000hz	510.587
n1	dC3	OFF	1000hz	514.221
n1	dC3	OFF	1000hz	656.126
n1	dC3	OFF	1000hz	516.38
n1	dC3	OFF	1000hz	480.946
n1	dC3	OFF	1000hz	475.734
n1	dC3	OFF	1000hz	529.514
n1	dC3	OFF	1000hz	523.54
n1	dC3	OFF	1000hz	512.114
n1	dC3	OFF	1000hz	541.809
n1	dC3	OFF	1000hz	416.324
n1	dC3	OFF	1000hz	519.558
n1	dC3	OFF	1000hz	728.497
n1	dC3	OFF	1000hz	473.31
n20	dC3	OFF	1000hz	449.301
n20	dC3	OFF	1000hz	539.427
n20	dC3	OFF	1000hz	857.663
n20	dC3	OFF	1000hz	711.469
n20	dC3	OFF	1000hz	523.534
n20	dC3	OFF	1000hz	607.784
n20	dC3	OFF	1000hz	492.158
n20	dC3	OFF	1000hz	496.564
n20	dC3	OFF	1000hz	730.98
n20	dC3	OFF	1000hz	650.091
n20	dC3	OFF	1000hz	402.769
n20	dC3	OFF	1000hz	465.276
n20	dC3	OFF	1000hz	583.386
n20	dC3	OFF	1000hz	716.807
n20	dC3	OFF	1000hz	472.07
n20	dC3	OFF	1000hz	472.027
n20	dC3	OFF	1000hz	473.735
n20	dC3	OFF	1000hz	552.708
n20	dC3	OFF	1000hz	838.904
n20	dC3	OFF	1000hz	579.127
n5	dC3	OFF	1000hz	489.322
n5	dC3	OFF	1000hz	408.281
n5	dC3	OFF	1000hz	606.401
n5	dC3	OFF	1000hz	865.571
n5	dC3	OFF	1000hz	521.271
n5	dC3	OFF	1000hz	491.319
n5	dC3	OFF	1000hz	441.14
n5	dC3	OFF	1000hz	413.431
n5	dC3	OFF	1000hz	673.183
n5	dC3	OFF	1000hz	481.899
n5	dC3	OFF	1000hz	418.276
n5	dC3	OFF	1000hz	454.005
n5	dC3	OFF	1000hz	449.283
n5	dC3	OFF	1000hz	514.339
n5	dC3	OFF	1000hz	493.634
n5	dC3	OFF	1000hz	479.61
n5	dC3	OFF	1000hz	541.562
n5	dC3	OFF	1000hz	450.279
n5	dC3	OFF	1000hz	577.833
n5	dC3	OFF	1000hz	546.102
n10	dC1	OFF	2000hz	299.421
n10	dC1	OFF	2000hz	403.507
n10	dC1	OFF	2000hz	608.134
n10	dC1	OFF	2000hz	892.37
n10	dC1	OFF	2000hz	490.816
n10	dC1	OFF	2000hz	553.632
n10	dC1	OFF	2000hz	402.253
n10	dC1	OFF	2000hz	413.739
n10	dC1	OFF	2000hz	611.027
n10	dC1	OFF	2000hz	469.045
n10	dC1	OFF	2000hz	331.322
n10	dC1	OFF	2000hz	559.522
n10	dC1	OFF	2000hz	426.903
n10	dC1	OFF	2000hz	655.943
n10	dC1	OFF	2000hz	609.153
n10	dC1	OFF	2000hz	841.434
n10	dC1	OFF	2000hz	408.536
n10	dC1	OFF	2000hz	618.376
n10	dC1	OFF	2000hz	552.566
n10	dC1	OFF	2000hz	476.371
n1	dC1	OFF	2000hz	479.316
n1	dC1	OFF	2000hz	615.391
n1	dC1	OFF	2000hz	583.384
n1	dC1	OFF	2000hz	908.048
n1	dC1	OFF	2000hz	1068.2
n1	dC1	OFF	2000hz	482.582
n1	dC1	OFF	2000hz	488.871
n1	dC1	OFF	2000hz	546.249
n1	dC1	OFF	2000hz	624.513
n1	dC1	OFF	2000hz	490.978
n1	dC1	OFF	2000hz	464.123
n1	dC1	OFF	2000hz	523.246
n1	dC1	OFF	2000hz	377.795
n1	dC1	OFF	2000hz	539.762
n1	dC1	OFF	2000hz	526.828
n1	dC1	OFF	2000hz	718.679
n1	dC1	OFF	2000hz	516.84
n1	dC1	OFF	2000hz	441.891
n1	dC1	OFF	2000hz	657.066
n1	dC1	OFF	2000hz	568.92
n20	dC1	OFF	2000hz	388.259
n20	dC1	OFF	2000hz	546.571
n20	dC1	OFF	2000hz	504.238
n20	dC1	OFF	2000hz	562.37
n20	dC1	OFF	2000hz	505.08
n20	dC1	OFF	2000hz	585.261
n20	dC1	OFF	2000hz	392.491
n20	dC1	OFF	2000hz	421.429
n20	dC1	OFF	2000hz	609.783
n20	dC1	OFF	2000hz	661.286
n20	dC1	OFF	2000hz	626.832
n20	dC1	OFF	2000hz	528.923
n20	dC1	OFF	2000hz	531.354
n20	dC1	OFF	2000hz	487.322
n20	dC1	OFF	2000hz	619.8
n20	dC1	OFF	2000hz	482.589
n20	dC1	OFF	2000hz	419.913
n20	dC1	OFF	2000hz	497.132
n20	dC1	OFF	2000hz	849.757
n20	dC1	OFF	2000hz	673.648
n5	dC1	OFF	2000hz	379.25
n5	dC1	OFF	2000hz	369.139
n5	dC1	OFF	2000hz	603.908
n5	dC1	OFF	2000hz	811.536
n5	dC1	OFF	2000hz	729.718
n5	dC1	OFF	2000hz	504.939
n5	dC1	OFF	2000hz	497.22
n5	dC1	OFF	2000hz	423.957
n5	dC1	OFF	2000hz	775.804
n5	dC1	OFF	2000hz	507.353
n5	dC1	OFF	2000hz	388.705
n5	dC1	OFF	2000hz	467.865
n5	dC1	OFF	2000hz	523.873
n5	dC1	OFF	2000hz	528.349
n5	dC1	OFF	2000hz	558.976
n5	dC1	OFF	2000hz	506.495
n5	dC1	OFF	2000hz	418.256
n5	dC1	OFF	2000hz	562.765
n5	dC1	OFF	2000hz	571.498
n5	dC1	OFF	2000hz	624.651
n10	dC2	OFF	2000hz	314.964
n10	dC2	OFF	2000hz	491.406
n10	dC2	OFF	2000hz	523.332
n10	dC2	OFF	2000hz	648.428
n10	dC2	OFF	2000hz	533.534
n10	dC2	OFF	2000hz	452.058
n10	dC2	OFF	2000hz	420.707
n10	dC2	OFF	2000hz	406.518
n10	dC2	OFF	2000hz	577.324
n10	dC2	OFF	2000hz	464.571
n10	dC2	OFF	2000hz	434.285
n10	dC2	OFF	2000hz	450.267
n10	dC2	OFF	2000hz	601.228
n10	dC2	OFF	2000hz	553.365
n10	dC2	OFF	2000hz	515.052
n10	dC2	OFF	2000hz	469.647
n10	dC2	OFF	2000hz	426.712
n10	dC2	OFF	2000hz	416.607
n10	dC2	OFF	2000hz	558.071
n10	dC2	OFF	2000hz	577.861
n1	dC2	OFF	2000hz	395.966
n1	dC2	OFF	2000hz	473.023
n1	dC2	OFF	2000hz	470.311
n1	dC2	OFF	2000hz	754.037
n1	dC2	OFF	2000hz	507.132
n1	dC2	OFF	2000hz	498.35
n1	dC2	OFF	2000hz	398.898
n1	dC2	OFF	2000hz	418.381
n1	dC2	OFF	2000hz	592.562
n1	dC2	OFF	2000hz	623.434
n1	dC2	OFF	2000hz	285.479
n1	dC2	OFF	2000hz	485.236
n1	dC2	OFF	2000hz	503.176
n1	dC2	OFF	2000hz	687.454
n1	dC2	OFF	2000hz	756.445
n1	dC2	OFF	2000hz	528.85
n1	dC2	OFF	2000hz	425.943
n1	dC2	OFF	2000hz	454.961
n1	dC2	OFF	2000hz	526.112
n1	dC2	OFF	2000hz	649.625
n20	dC2	OFF	2000hz	351.231
n20	dC2	OFF	2000hz	409.622
n20	dC2	OFF	2000hz	582.418
n20	dC2	OFF	2000hz	710.679
n20	dC2	OFF	2000hz	505.855
n20	dC2	OFF	2000hz	428.839
n20	dC2	OFF	2000hz	429.783
n20	dC2	OFF	2000hz	406.332
n20	dC2	OFF	2000hz	645.629
n20	dC2	OFF	2000hz	537.824
n20	dC2	OFF	2000hz	414.938
n20	dC2	OFF	2000hz	515.701
n20	dC2	OFF	2000hz	514.49
n20	dC2	OFF	2000hz	574.377
n20	dC2	OFF	2000hz	456.869
n20	dC2	OFF	2000hz	542.26
n20	dC2	OFF	2000hz	450.496
n20	dC2	OFF	2000hz	412.295
n20	dC2	OFF	2000hz	619.514
n20	dC2	OFF	2000hz	463.458
n5	dC2	OFF	2000hz	481.573
n5	dC2	OFF	2000hz	474.956
n5	dC2	OFF	2000hz	497.123
n5	dC2	OFF	2000hz	580.383
n5	dC2	OFF	2000hz	573.221
n5	dC2	OFF	2000hz	622.296
n5	dC2	OFF	2000hz	430.681
n5	dC2	OFF	2000hz	409.969
n5	dC2	OFF	2000hz	582.112
n5	dC2	OFF	2000hz	483.407
n5	dC2	OFF	2000hz	339.224
n5	dC2	OFF	2000hz	474.871
n5	dC2	OFF	2000hz	519.874
n5	dC2	OFF	2000hz	559.37
n5	dC2	OFF	2000hz	451.394
n5	dC2	OFF	2000hz	438.83
n5	dC2	OFF	2000hz	404.497
n5	dC2	OFF	2000hz	445.097
n5	dC2	OFF	2000hz	555.635
n5	dC2	OFF	2000hz	508.162
n10	dC3	OFF	2000hz	411.663
n10	dC3	OFF	2000hz	481.484
n10	dC3	OFF	2000hz	521.484
n10	dC3	OFF	2000hz	570.375
n10	dC3	OFF	2000hz	453.668
n10	dC3	OFF	2000hz	537.208
n10	dC3	OFF	2000hz	364.981
n10	dC3	OFF	2000hz	395.603
n10	dC3	OFF	2000hz	520.696
n10	dC3	OFF	2000hz	467.118
n10	dC3	OFF	2000hz	391.258
n10	dC3	OFF	2000hz	535.509
n10	dC3	OFF	2000hz	467.343
n10	dC3	OFF	2000hz	504.334
n10	dC3	OFF	2000hz	466.814
n10	dC3	OFF	2000hz	497.343
n10	dC3	OFF	2000hz	443.663
n10	dC3	OFF	2000hz	440.344
n10	dC3	OFF	2000hz	782.831
n10	dC3	OFF	2000hz	489.913
n1	dC3	OFF	2000hz	481.231
n1	dC3	OFF	2000hz	410.678
n1	dC3	OFF	2000hz	609.524
n1	dC3	OFF	2000hz	569.38
n1	dC3	OFF	2000hz	729.79
n1	dC3	OFF	2000hz	606.801
n1	dC3	OFF	2000hz	421.388
n1	dC3	OFF	2000hz	426.487
n1	dC3	OFF	2000hz	561.166
n1	dC3	OFF	2000hz	576.364
n1	dC3	OFF	2000hz	554.81
n1	dC3	OFF	2000hz	515.727
n1	dC3	OFF	2000hz	386.285
n1	dC3	OFF	2000hz	514.343
n1	dC3	OFF	2000hz	465.217
n1	dC3	OFF	2000hz	471.666
n1	dC3	OFF	2000hz	377.646
n1	dC3	OFF	2000hz	438.427
n1	dC3	OFF	2000hz	617.008
n1	dC3	OFF	2000hz	457.635
n20	dC3	OFF	2000hz	457.457
n20	dC3	OFF	2000hz	407.188
n20	dC3	OFF	2000hz	562.78
n20	dC3	OFF	2000hz	573.249
n20	dC3	OFF	2000hz	483.415
n20	dC3	OFF	2000hz	509.078
n20	dC3	OFF	2000hz	414.436
n20	dC3	OFF	2000hz	453.905
n20	dC3	OFF	2000hz	733.247
n20	dC3	OFF	2000hz	474.141
n20	dC3	OFF	2000hz	563.371
n20	dC3	OFF	2000hz	475.215
n20	dC3	OFF	2000hz	444.409
n20	dC3	OFF	2000hz	730.296
n20	dC3	OFF	2000hz	539.505
n20	dC3	OFF	2000hz	546.768
n20	dC3	OFF	2000hz	448.101
n20	dC3	OFF	2000hz	443.011
n20	dC3	OFF	2000hz	572.562
n20	dC3	OFF	2000hz	538.178
n5	dC3	OFF	2000hz	419.477
n5	dC3	OFF	2000hz	513.067
n5	dC3	OFF	2000hz	515.835
n5	dC3	OFF	2000hz	738.491
n5	dC3	OFF	2000hz	524.855
n5	dC3	OFF	2000hz	434.361
n5	dC3	OFF	2000hz	384.856
n5	dC3	OFF	2000hz	460.071
n5	dC3	OFF	2000hz	632.767
n5	dC3	OFF	2000hz	522.549
n5	dC3	OFF	2000hz	418.277
n5	dC3	OFF	2000hz	457.547
n5	dC3	OFF	2000hz	443.605
n5	dC3	OFF	2000hz	618.409
n5	dC3	OFF	2000hz	506.801
n5	dC3	OFF	2000hz	496.712
n5	dC3	OFF	2000hz	432.749
n5	dC3	OFF	2000hz	424.066
n5	dC3	OFF	2000hz	633.863
n5	dC3	OFF	2000hz	501.181
